# Supplementary material for: Galectin-3 deficiency drives lupus-like disease by promoting spontaneous germinal centers formation via IFN-γ
Source: PubMed Central journal article supplement (PMC5915532; doi:10.1038/s41467-018-04063-5), 2018-04-24
Supplement: 41467_2018_4063_MOESM1_ESM.pdf [file 41467_2018_4063_MOESM1_ESM.pdf]

## Supplementary Information

### **Galectin-3 deficiency drives lupus-like disease by promoting spontaneous germinal centers formation via IFN- $\gamma$**

*Beccaria et al.*

## Supplementary Figures

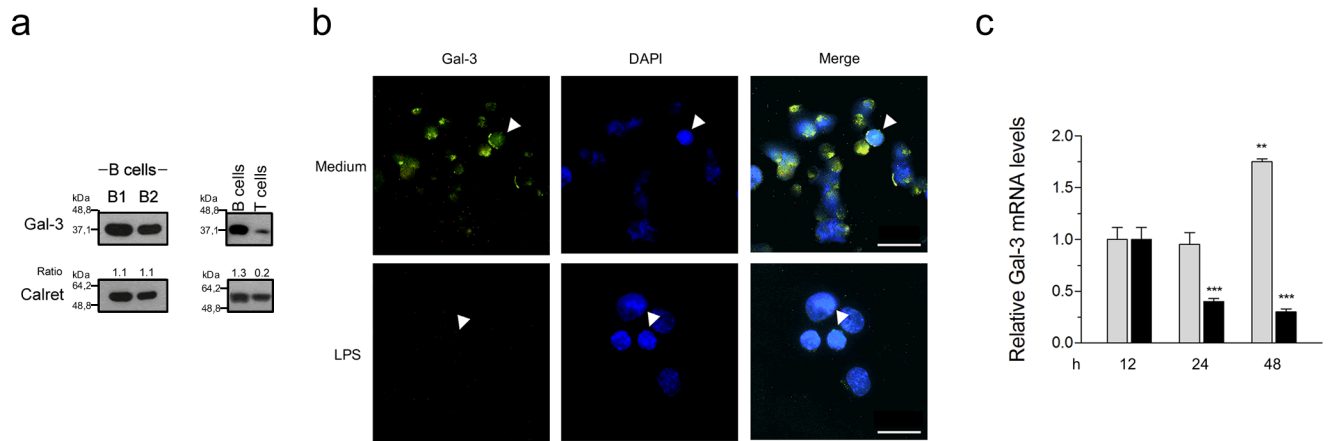

### Supplementary Figure 1. Down-regulation of Gal-3 during PC differentiation.

(a) Comparative western blot of the expression of Gal-3 in murine ex-vivo peritoneal B1 cell (B1) and follicular splenic B cell (B2), and total splenic B and T cells. Gal-3 signal was normalized to the loading control calreticulin (Calret), and ratios are shown between the pictures ( $n = 5$  for each condition). (b) Immunofluorescence for Gal-3 expression in splenic B cells cultured with Medium (upper panels) or LPS (lower panels) for 72 h. The specific Gal-3 signal is shown in green. Nuclei were counter-stained with DAPI (blue). White arrowheads indicate the presence (upper panels) or absence (lower panels) of Gal-3 in B cells cultures with medium and LPS, respectively ( $n = 4$  for each condition). Scale bar, 20  $\mu\text{m}$  (c) Quantitative RT-PCR analysis of Gal-3 mRNA levels of purified splenic B cells cultured with Medium (grey bars) or LPS (black bars) for 12, 24 and 48 h ( $n = 6$  for each condition). \*\*  $p < 0.01$ ; \*\*\*  $p < 0.001$  (one-way ANOVA; Tukey-Kramer multiple comparison test). Data are representative of three independent experiments.

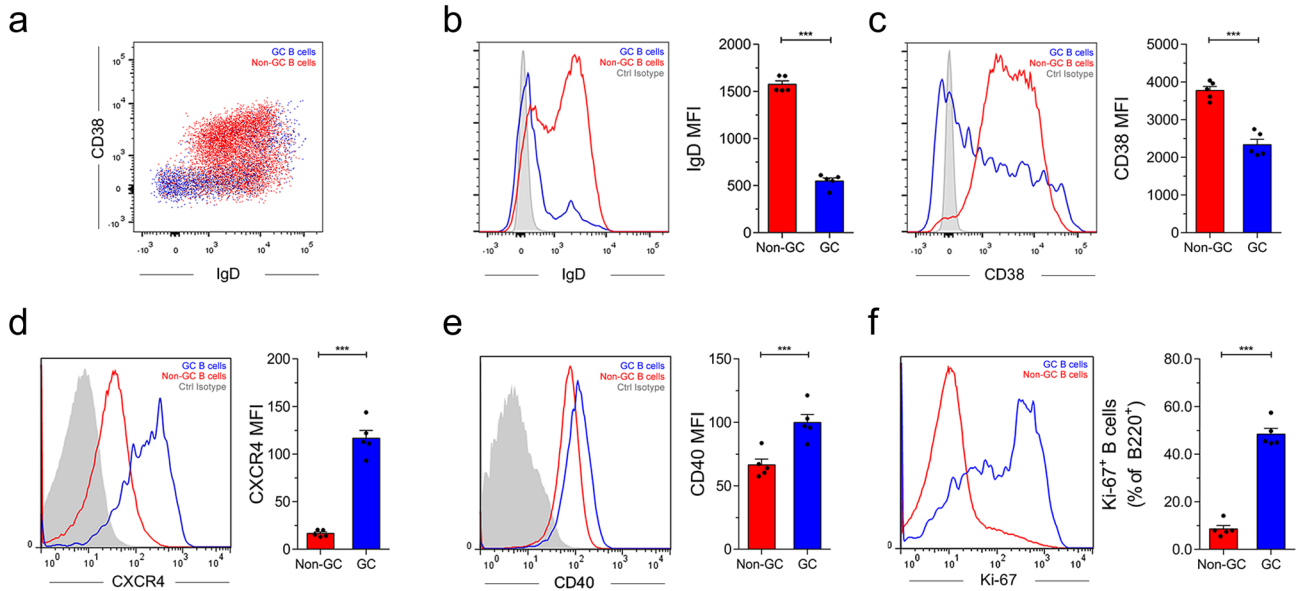

**Supplementary Figure 2. Deep characterization of GC B cells in Gal-3 KO mice.**

(a) Representative dot plot of CD38 vs IgD of gated B220<sup>+</sup> cells from the spleen of Gal-3 KO mice showing GC (blue) and non-GC B cells (red) ( $n = 5$  for both strains). (b-e) Representative histograms and statistical analysis of mean fluorescence intensity (MFI) of IgD (b), CD38 (c), CXCR4 (d) and CD40 (e) on GC (B220<sup>+</sup> CD4<sup>-</sup> GL7<sup>+</sup> FAS<sup>+</sup>) and non-GC (B220<sup>+</sup> CD4<sup>-</sup> GL7<sup>-</sup> FAS<sup>-</sup>) B cells from 8 week-old Gal-3 KO mice ( $n = 5$  for both strains). (f) Representative histogram and statistical analysis of the frequency of Ki-67<sup>+</sup> cells in GC and non-GC B cells from 8 week-old Gal-3 KO mice ( $n = 5$  for both strains). \*\*\*  $p < 0.001$  (paired Student's t-test). Data are representative of three independent experiments.

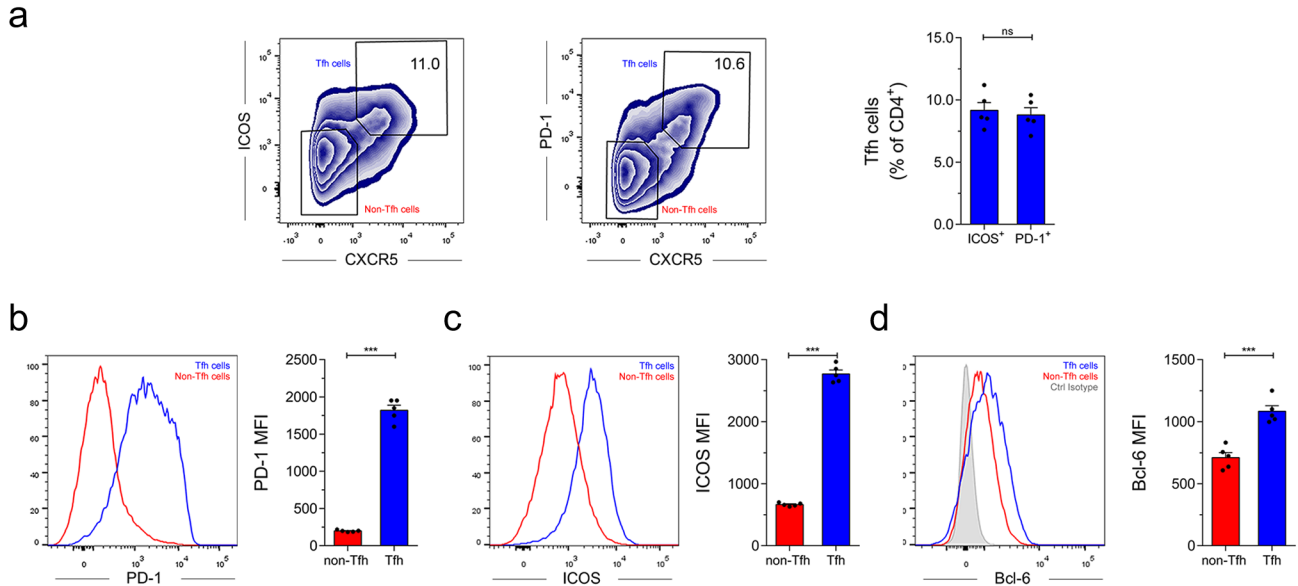

**Supplementary Figure 3. Identification of bonafide Tfh cells in Gal-3 KO mice.**

(a) Representative dot plot and statistical analysis of the frequency of Tfh cell from spleen of 8-week-old Gal-3 KO mice identified by expression of CXCR5<sup>+</sup> ICOS<sup>+</sup> (left) or CXCR5<sup>+</sup> PD-1<sup>+</sup> (right) gated on CD4<sup>+</sup> Foxp3<sup>-</sup> T cells ( $n = 5$  for both strains). (b) Representative histograms and statistical analysis of Mean Fluorescence Intensity (MFI) of PD-1 staining in Tfh cell (CD4<sup>+</sup> CXCR5<sup>+</sup> ICOS<sup>+</sup> Foxp3<sup>-</sup>) and non-Tfh (CD4<sup>+</sup> CXCR5<sup>-</sup> ICOS<sup>-</sup> Foxp3<sup>-</sup>) from spleen of 8-week-old Gal-3 KO mice ( $n = 5$  for both strains). (c) Representative histograms and statistical analysis of MFI of ICOS staining on Tfh cell (CD4<sup>+</sup> CXCR5<sup>+</sup> PD-1<sup>+</sup> Foxp3<sup>-</sup>) and non-Tfh (CD4<sup>+</sup> CXCR5<sup>-</sup> PD-1<sup>-</sup> Foxp3<sup>-</sup>) from spleen of 8-week-old Gal-3 KO mice ( $n = 5$  for both strains). (d) Representative histograms and statistical analysis of MFI of Bcl-6 staining in Tfh cell (CD4<sup>+</sup> CXCR5<sup>+</sup> ICOS<sup>+</sup> Foxp3<sup>-</sup>) and non-Tfh (CD4<sup>+</sup> CXCR5<sup>-</sup> ICOS<sup>-</sup> Foxp3<sup>-</sup>) from spleen of 8-week-old Gal-3 KO mice ( $n = 5$  for both strains). \*\*\*  $p < 0.001$  (paired Student's t-test); ns, not significant. Data are representative of three independent experiments.



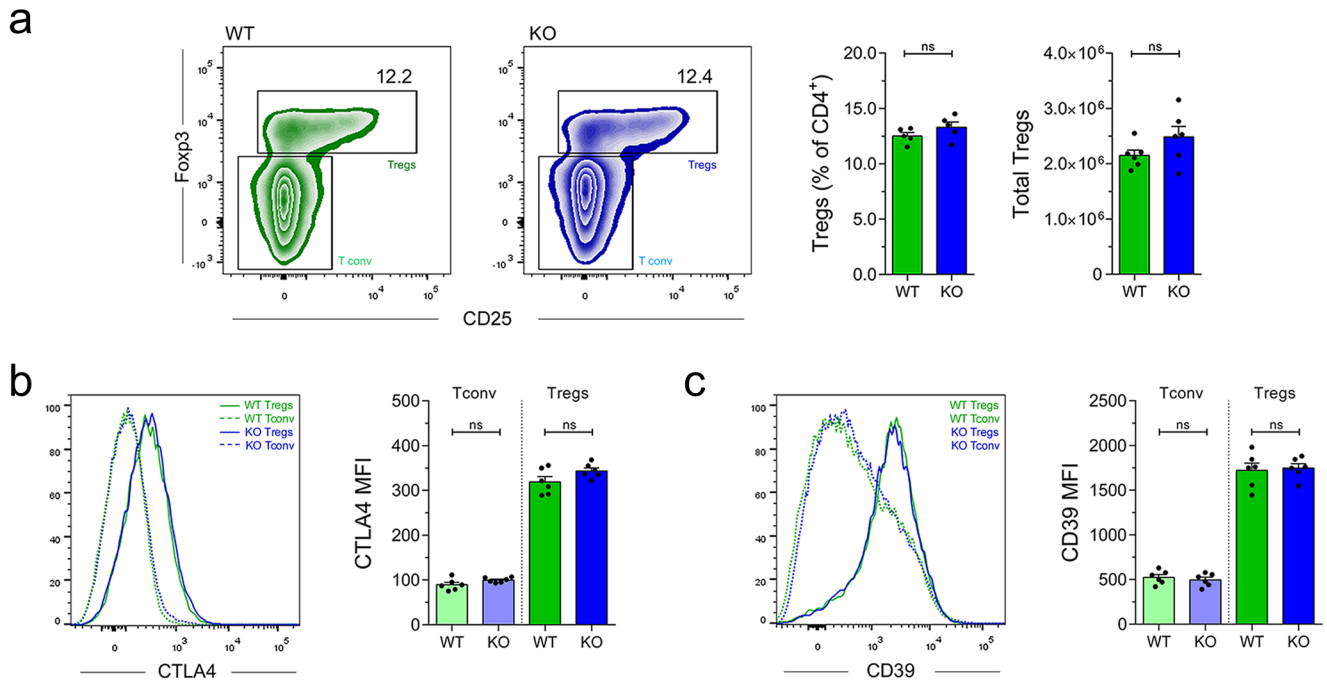

**Supplementary Figure 4. Comparative study of regulatory T cells.**

(a) Representative dot plot and statistical analysis of the frequency and number of Tregs cells (CD4<sup>+</sup> Foxp3<sup>+</sup> CD25<sup>+</sup>) ( $n = 6$  for both strains). (b-c) Representative histogram and statistical analysis of the Mean Fluorescence Intensity (MFI) of CTLA4 (b) and CD39 (c) on Tregs cell (CD4<sup>+</sup> Foxp3<sup>+</sup> CD25<sup>+</sup>; dark colors) and conventional CD4<sup>+</sup> T cells (CD4<sup>+</sup> Foxp3<sup>-</sup> CD25<sup>-</sup>; light colors) from spleen of 8-week-old WT (green) and Gal-3 KO mice (blue) ( $n = 6$  for both strains). ns, not significant (unpaired Student's t-test). Data are representative of three independent experiments.

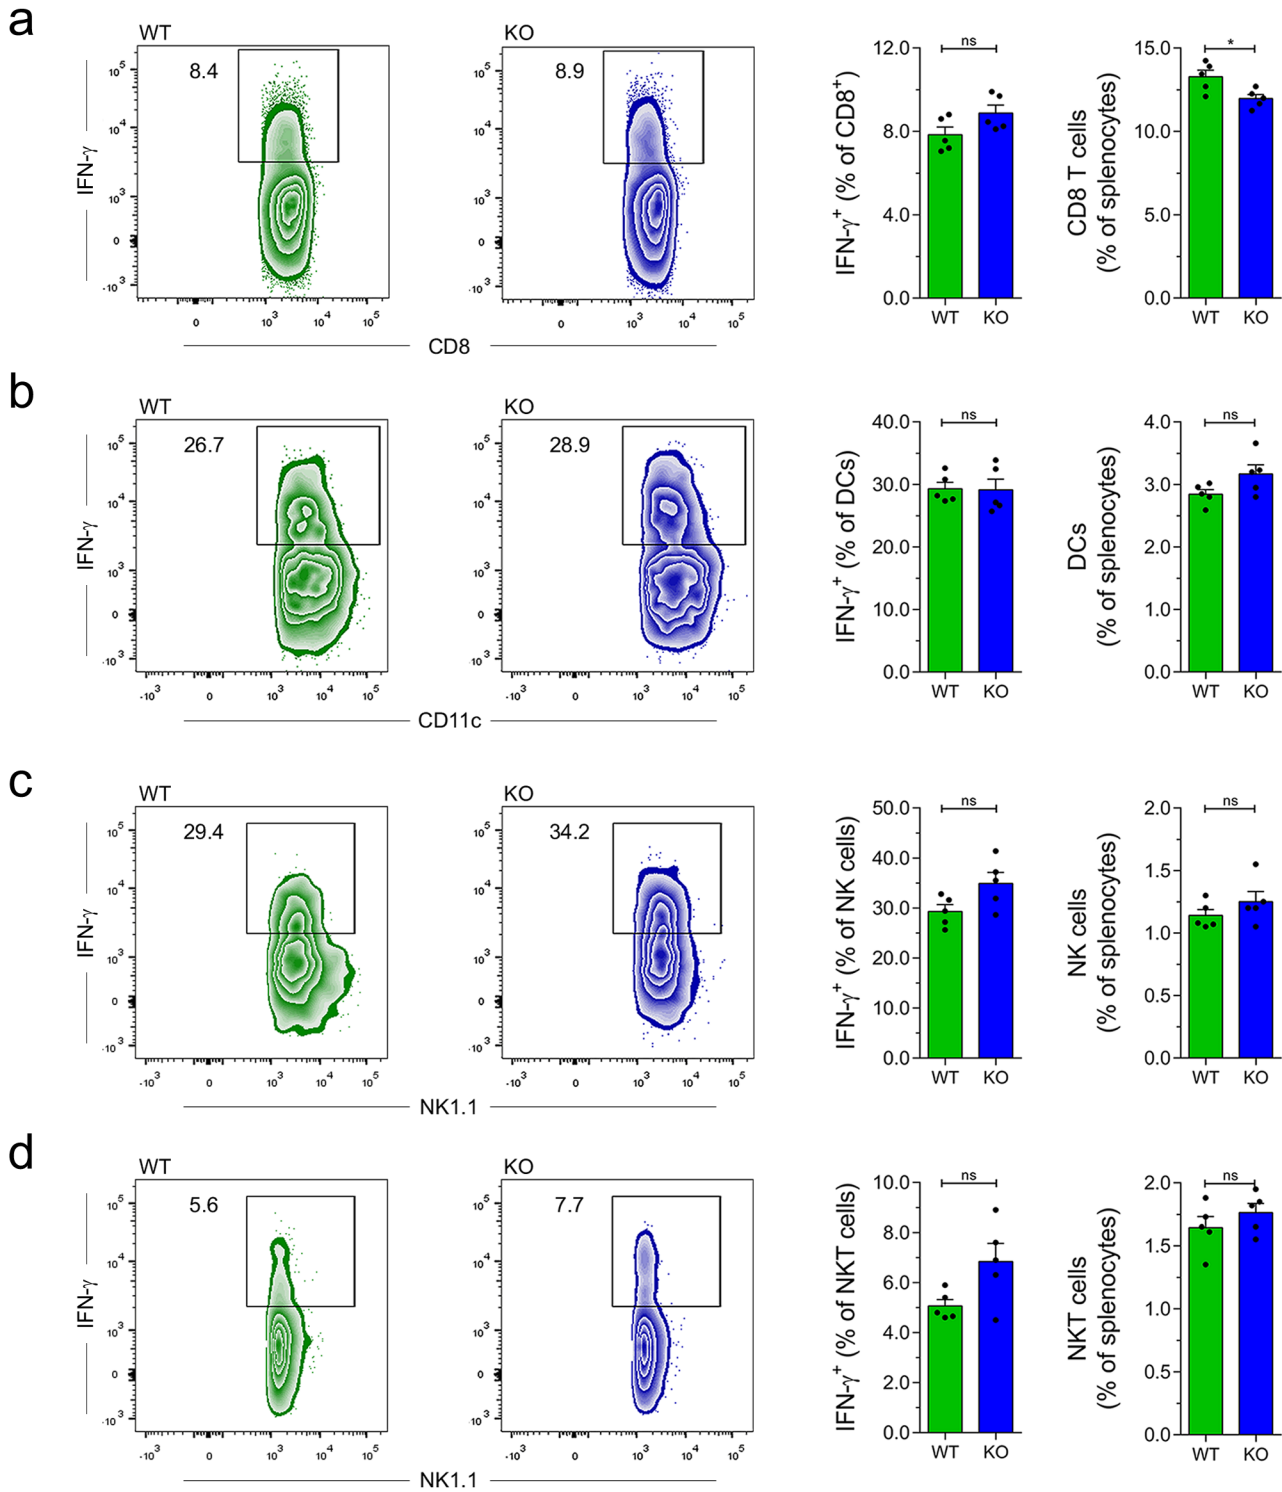

**Supplementary Figure 5. IFN- $\gamma$ -producing non-CD4<sup>+</sup> T cells.**

(a-d) Representative plots and statistical analysis of the frequency of IFN- $\gamma$ -producing CD8<sup>+</sup> T cells (CD3<sup>+</sup> CD8<sup>+</sup> CD4<sup>-</sup>) (a), DC cells (CD11c<sup>+</sup> IA/IE<sup>+</sup> CD3<sup>-</sup> CD19<sup>-</sup>) (b), NK cells (NK1.1<sup>+</sup> CD49b<sup>+</sup> CD3<sup>-</sup> TCR $\beta$ <sup>-</sup>) (c) and NKT cells (NK1.1<sup>+</sup> CD49b<sup>+</sup> CD3<sup>+</sup> TCR $\beta$ <sup>+</sup>) ( $n = 5$  for both strains) (d). Bar graphs on the right show the percentage of each indicated population in the spleen. \*  $p < 0.05$ ; ns, not significant (unpaired Student's t-test). Data are representative of three independent experiments.

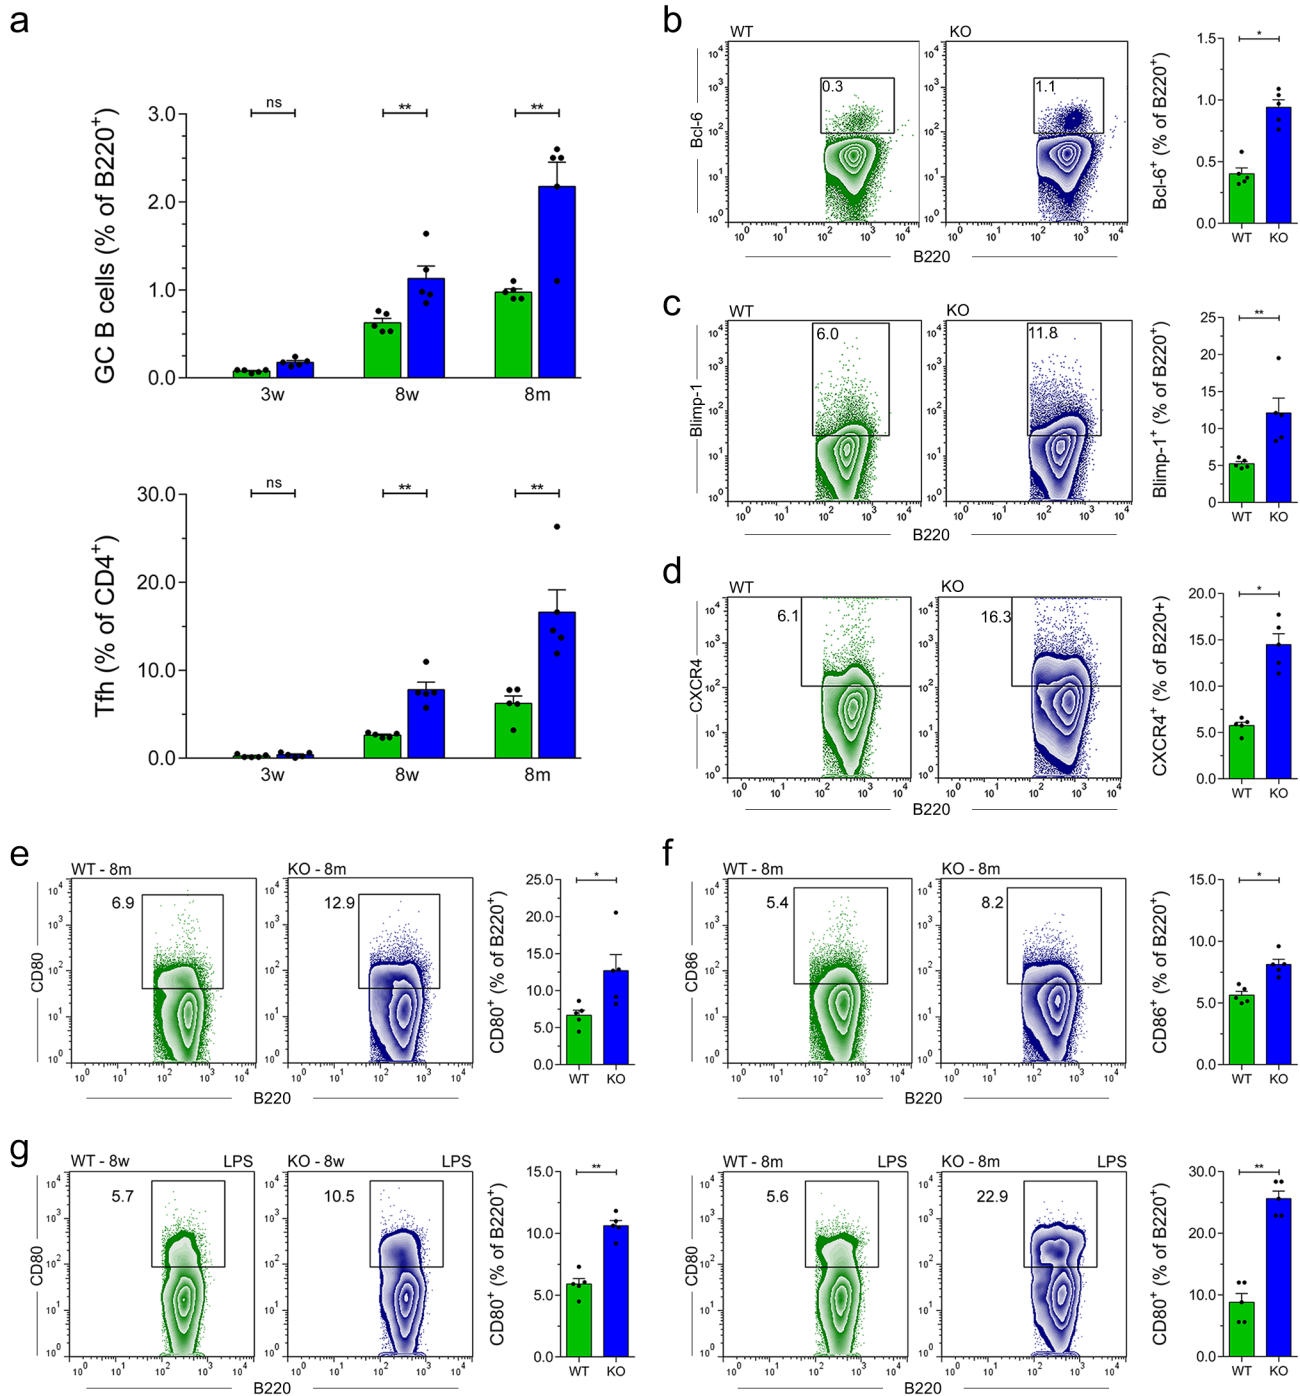

### Supplementary Figure 6. Aged Gal-3 KO mice exhibit an activated B cell phenotype

(a) Bar graphs of the frequency of GC B cells (upper graph) and Tfh (lower graph) in the spleen from 3-week-, 8-week- or 8-month-old WT and Gal-3 KO mice ( $n = 5$  per group at each time point). (b-d) Representative plots and statistical analysis of the frequency of Bcl-6<sup>+</sup>, CXCR4<sup>+</sup> and Blimp-1<sup>+</sup> B220<sup>+</sup> B cells in the spleen from 8-month-old WT and Gal-3 KO mice, respectively ( $n = 5$  for both strains). (e-f) Representative plots and statistical analysis of the percentages of CD80<sup>+</sup> and CD86<sup>+</sup> B cells of the spleen from 8-month-old WT (green) and Gal-3 KO (blue) mice ( $n = 5$  for both strains). (g) Representative plots and statistical analysis of the percentages of CD80<sup>+</sup> B cells of the spleen from 8-week (left) and 8-month-old (right) WT (green) and Gal-3 KO (blue) mice cultured with LPS for 24h ( $n = 5$  for each condition). \*  $p < 0.05$ , \*\*  $p < 0.005$  (unpaired Student's t-test). Data are representative of three independent experiments.

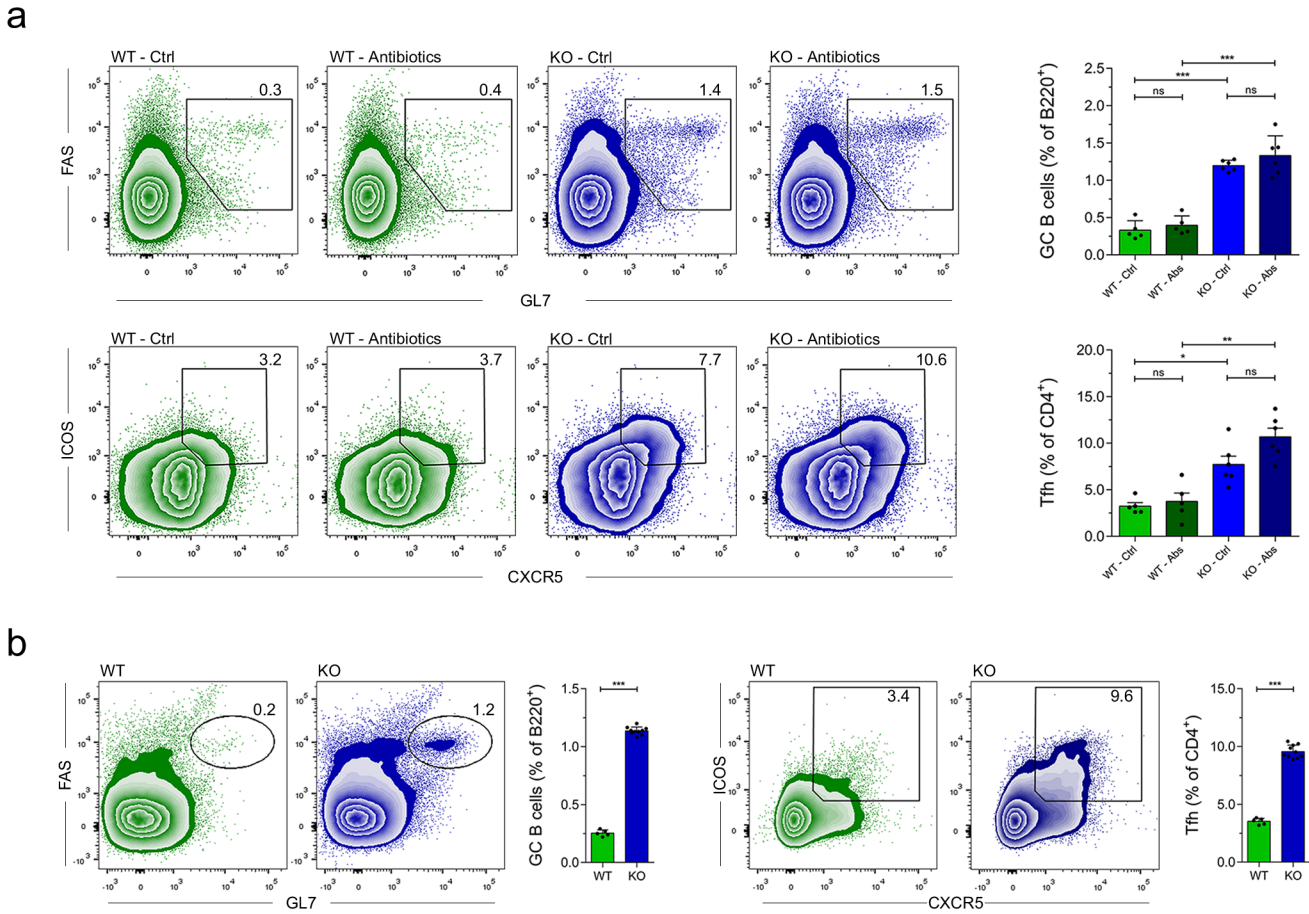

**Supplementary Figure 7. Antibiotic treatment and co-housed experiments does not modify the frequency of GC B cells nor Tfh cells in Gal-3 KO mice.**

(a) Representative plots and statistical analysis of the frequency of GC B cells (B220<sup>+</sup> FAS<sup>+</sup> GL7<sup>+</sup> CD3<sup>-</sup>; upper panels) and Tfh cells (CD4<sup>+</sup> CXCR5<sup>+</sup> ICOS<sup>+</sup> Foxp3<sup>-</sup> B220<sup>-</sup>; lower panels) in spleen from WT (green) and Gal-3 KO (blue) mice receiving water (controls, indicated as Ctrl) or antibiotics (indicated as Antibiotics) (WT  $n = 5$ ; Gal-3 KO  $n = 6$ ). (b) Representative plots and statistical analysis of the frequency of GC B cells (left panels) and Tfh cells (right panels) in the spleen of co-housed WT (green) and Gal-3 KO (blue) (WT  $n = 5$ ; Gal-3 KO  $n = 10$ ). \*  $p < 0.05$ , \*\*  $p < 0.005$ , \*\*\*  $p < 0.001$ . ns, not significant (one-way ANOVA; Tukey–Kramer multiple comparison test was used for experiments displayed in a and unpaired Student's t-test was used in b). Data are representative of two independent experiments.

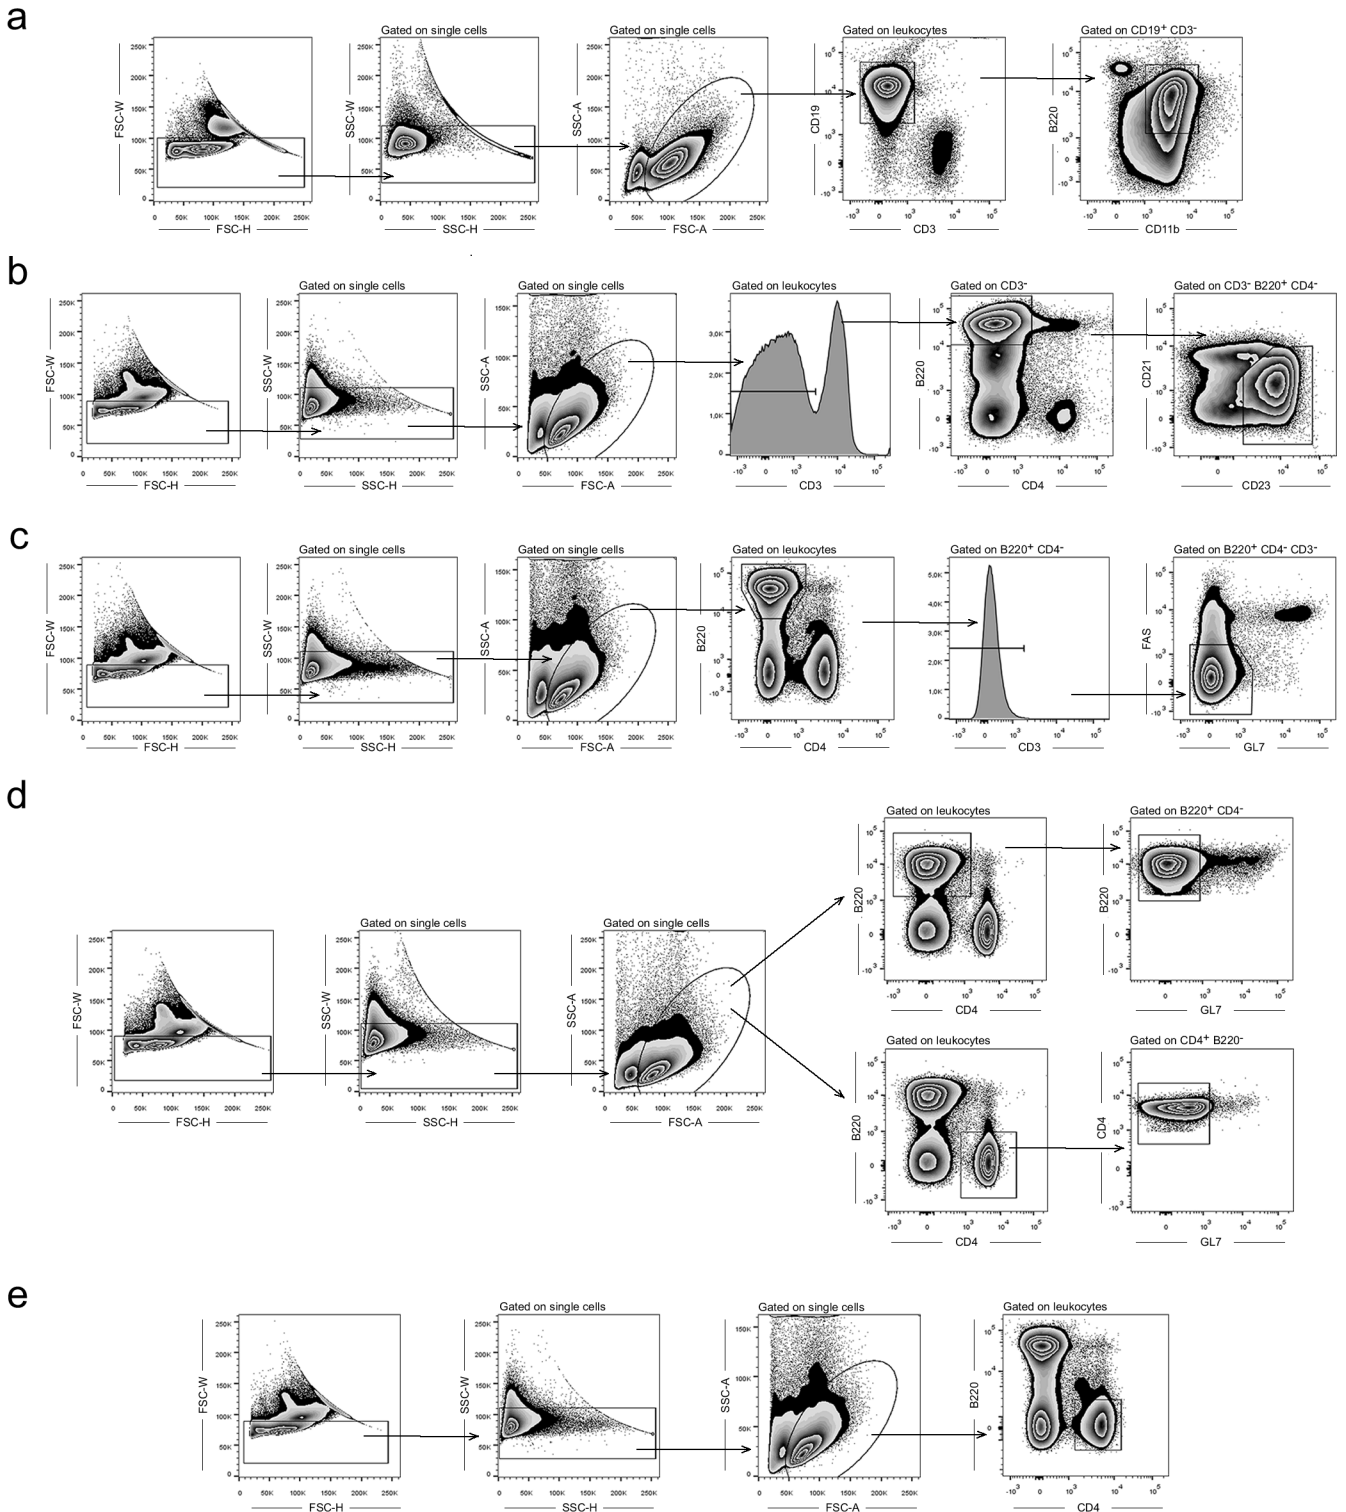

**Supplementary Figure 8. Gating strategies used for cell sorting.**

(a) Gating strategy to sort peritoneal B1 cells ( $CD19^+ B220^+ CD11b^+ CD3^-$ ) from WT mice for experiments presented on Supplementary Figure 1a. (b) Gating strategy to sort follicular splenic B2 cells ( $B220^+ CD21^+ CD23^{high} CD3^- CD4^-$ ) from WT mice for experiments presented on Supplementary Figure 1a. (c) Gating strategy to sort non-GC B cells ( $B220^+ FAS^- GL7^- CD3^- CD4^-$ ) from WT and Gal-3 KO mice for experiments presented on Fig. 3b. (d) Gating strategy to sort B cells ( $B220^+ GL7^- CD4^-$ ) and  $CD4^+$  T cells ( $CD4^+ GL7^- B220^-$ ) from WT and Gal-3 KO mice for experiments presented on Fig. 3c. (e) Gating strategy to sort  $CD4^+$  T cells ( $CD4^+ B220^-$ ) from WT and Gal-3 KO mice for experiments presented on Fig. 4a.



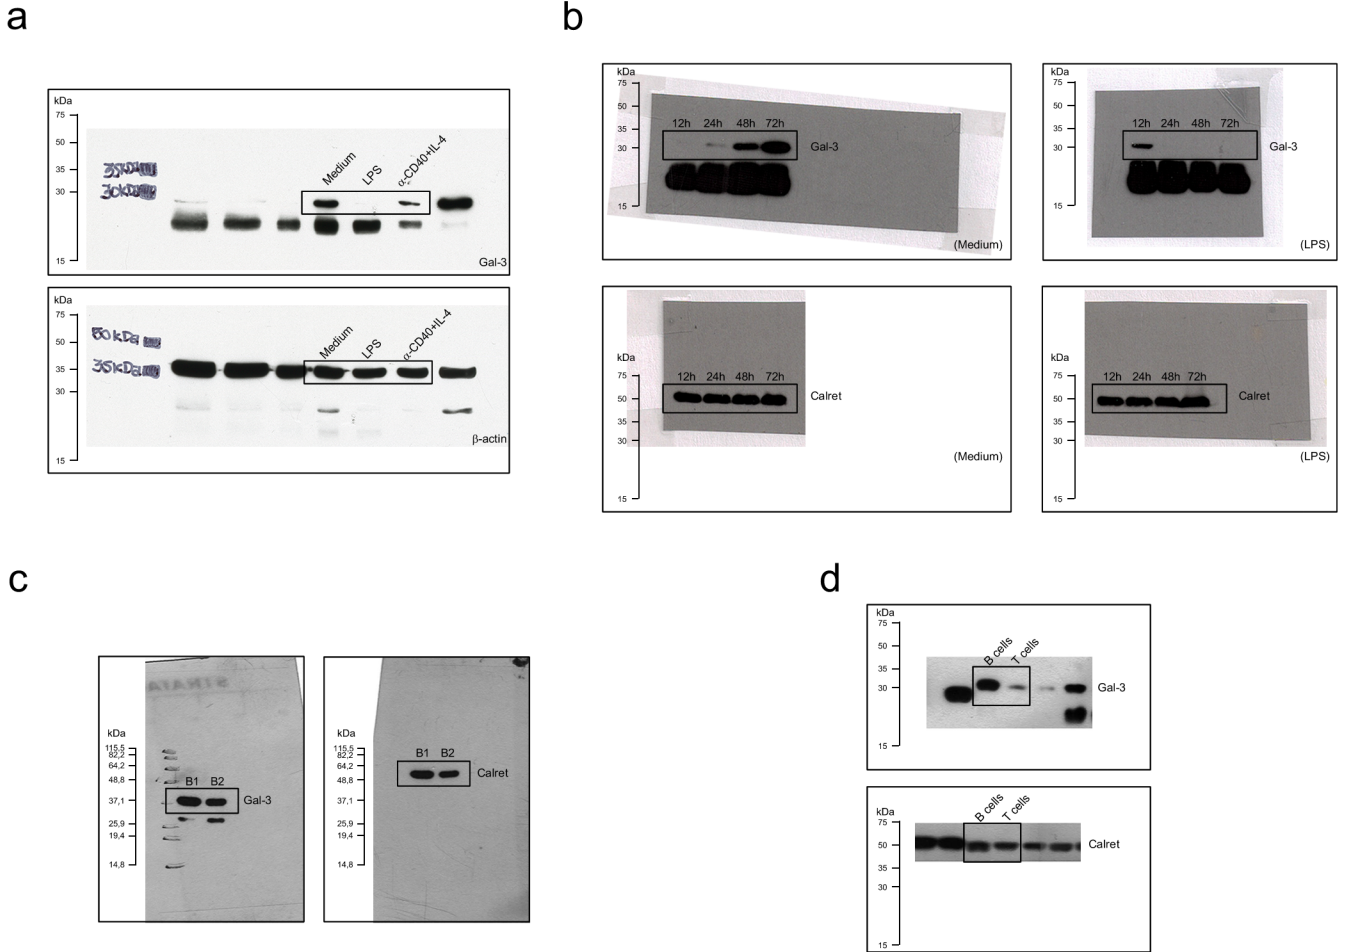

**Supplementary Figure 9. Original data of immunoblots.**

(a) Immunoblot data corresponding to Fig. 1a. (b) Immunoblot data corresponding to Fig. 1b. (c) Immunoblot data corresponding to Supplementary Figure 1a (left immunoblot). (d) Immunoblot data corresponding to Supplementary Figure 1a (right immunoblot).

## Supplementary Table

| <b>Specificity and Fluorochrome</b>  | <b>Clone</b> | <b>Catalog Number</b> | <b>Source</b> | <b>Dilution</b> |
|--------------------------------------|--------------|-----------------------|---------------|-----------------|
| Anti-B220 FITC                       | RA3-6B2      | 103206                | BioLegend     | 1/200           |
| Anti-B220 PE                         | RA3-6B2      | 103208                | BioLegend     | 1/400           |
| Anti-B220 PE-Cy7                     | RA3-6B2      | 103222                | BioLegend     | 1/400           |
| Anti-CD3 $\epsilon$ PerCP-Cy5.5      | 145-2C11     | 100328                | BioLegend     | 1/200           |
| Anti-CD86 APC                        | GL-1         | 105012                | BioLegend     | 1/200           |
| Anti-CD4 APC-Cy7                     | GK1.5        | 100414                | BioLegend     | 1/200           |
| Anti-CD23 FITC                       | B3B4         | 101606                | BioLegend     | 1/100           |
| Anti-IFN- $\gamma$ FITC              | XMG1.2       | 505806                | BioLegend     | 1/100           |
| Anti-Bcl-6 PE                        | 7D1          | 358504                | BioLegend     | 1/75            |
| Anti-IL-21R APC                      | 4A9          | 131910                | BioLegend     | 1/100           |
| Anti-ICOS PE-Cy7                     | C398.4A      | 313520                | BioLegend     | 1/100           |
| Anti-IgD Alexa Fluor 594             | 11-26c.2a    | 405740                | BioLegend     | 1/200           |
| Anti-IFN- $\gamma$ R $\alpha$ Biotin | 2E2          | 112804                | BioLegend     | 1/200           |
| Anti-NK1.1 PE-Cy7                    | PK136        | 108714                | BioLegend     | 1/200           |
| Anti-TCR $\beta$ chain APC           | H57-597      | 109212                | BioLegend     | 1/200           |
| Anti-B220 APC                        | RA3-6B2      | 17-0452-83            | eBioscience   | 1/400           |
| Anti-CD11b FITC                      | M1/70        | 11-0112-85            | eBioscience   | 1/100           |
| Anti-CD21 PE                         | eBio8D9      | 12-0211-82            | eBioscience   | 1/200           |
| Anti-PD-1 PE                         | J43          | 12-9985-82            | eBioscience   | 1/200           |
| Anti-CD4 PE                          | GK1.5        | 12-0041-82            | eBioscience   | 1/400           |
| Anti-CXCR4 PE                        | 2B11         | 12-9991-82            | eBioscience   | 1/200           |
| Anti-CD40 PE                         | 1C10         | 12-0401-82            | eBioscience   | 1/200           |
| Anti-CD69 PerCP-Cy5.5                | H1.2F3       | 45-0691-82            | eBioscience   | 1/200           |
| Anti-Foxp3 PerCP-Cy5.5               | FJK-16s      | 45-5773-82            | eBioscience   | 1/100           |
| Anti-Foxp3 APC                       | FJK-16s      | 17-5773-82            | eBioscience   | 1/100           |
| Anti-IFN- $\gamma$ APC               | XMG1.2       | 17-7311-82            | eBioscience   | 1/200           |
| Anti-Ki-67 eFluor660                 | SolA15       | 50-5699-82            | eBioscience   | 1/600           |
| Anti-GL7 eFluor660                   | GL7          | 50-5902-82            | eBioscience   | 1/300           |
| Anti-CD39 PerCP-eFluor710            | 24DMS1       | 46-0391-82            | eBioscience   | 1/400           |
| Anti-CTLA-4 PE                       | UC10-4B9     | 12-1522-82            | eBioscience   | 1/75            |
| Anti-CD49b PE                        | DX5          | 12-5971-82            | eBioscience   | 1/200           |

|                                           |                |            |                        |       |
|-------------------------------------------|----------------|------------|------------------------|-------|
| Anti-MHC Class II I-Ab<br>PerCP-eFluor710 | AF6-120.1      | 46-5320-82 | eBioscience            | 1/200 |
| Anti-CD11c PE-Cy7                         | N418           | 25-0114-82 | eBioscience            | 1/300 |
| Anti-CD11c-FITC                           | HL-3           | 553801     | BD Biosciences         | 1/100 |
| Anti-CD45.1-APC-Cy7                       | A20            | 560579     | BD Biosciences         | 1/200 |
| Anti-CD45.2-PerCP-Cy5.5                   | 104            | 552950     | BD Biosciences         | 1/200 |
| Anti-IL-17-PE                             | TC11-<br>18H10 | 559502     | BD Biosciences         | 1/200 |
| Anti-Bcl-6-PE-Cy7                         | K112-91        | 563582     | BD Biosciences         | 1/75  |
| Anti-CD80-PE                              | 16-10A1        | 553769     | BD Biosciences         | 1/200 |
| Anti-CD138-APC                            | 281-2          | 558626     | BD Biosciences         | 1/200 |
| Anti-FAS (CD95)-PE                        | Jo2            | 554258     | BD Biosciences         | 1/200 |
| Anti-FAS (CD95)-PE-Cy7                    | Jo2            | 557653     | BD Biosciences         | 1/200 |
| Anti-FAS (CD95)-Biotin                    | Jo2            | 554256     | BD Biosciences         | 1/200 |
| Anti-CXCR5-Biotin                         | 2G8            | 551960     | BD Biosciences         | 1/75  |
| Anti-IgD FITC                             | 11-26c.2a      | 553439     | BD Biosciences         | 1/100 |
| Anti-CD38 PE                              | 90             | 553764     | BD Biosciences         | 1/200 |
| Anti-Blimp-1-PE                           | C-21           | sc-47732   | Santa Cruz             | 1/75  |
| Anti-CD4-Alexa Fluor 488                  | RM4-5          | MCD0420    | Invitrogen             | 1/200 |
| Anti-CD3-Alexa Fluor 647                  | 500A2          | HM3421     | Invitrogen             | 1/200 |
| Anti-IgG(H+L)-Alexa Fluor<br>594          | Polyconal      | A-11007    | Invitrogen             | 1/200 |
| Streptavidin PerCP-Cy5.5                  | ND             | 405214     | BioLegend              | 1/200 |
| Streptavidin APC                          | ND             | 405207     | BioLegend              | 1/400 |
| Streptavidin PE                           | ND             | 554061     | BD Biosciences         | 1/400 |
| PNA-FITC                                  | ND             | FL-1071    | Vector<br>Laboratories | 1/200 |
| PNA-Alexa Fluor 647                       | ND             | L32460     | Invitrogen             | 1/400 |

**Supplementary Table 1.** Antibodies and staining reagents used in this study.
